# Supplementary material
Source: publisher figshare collection journal article supplement (https://acs.figshare.com/ndownloader/files/4236136)
Supplement: Supplementary file 1 [file 4236136]

 
data_wue4747 
 
_audit_creation_method            SHELXL-97 
_chemical_name_systematic 
; 
 ? 
; 
_chemical_name_common             ? 
_chemical_melting_point           ? 
_chemical_formula_moiety          ? 
_chemical_formula_sum 
 'C44 H36 Cl8 N4' 
_chemical_formula_weight          904.37 
 
loop_ 
 _atom_type_symbol 
 _atom_type_description 
 _atom_type_scat_dispersion_real 
 _atom_type_scat_dispersion_imag 
 _atom_type_scat_source 
 'C'  'C'   0.0181   0.0091 
 'International Tables Vol C Tables 4.2.6.8 and 6.1.1.4' 
 'H'  'H'   0.0000   0.0000 
 'International Tables Vol C Tables 4.2.6.8 and 6.1.1.4' 
 'N'  'N'   0.0311   0.0180 
 'International Tables Vol C Tables 4.2.6.8 and 6.1.1.4' 
 'Cl'  'Cl'   0.3639   0.7018 
 'International Tables Vol C Tables 4.2.6.8 and 6.1.1.4' 
 
_symmetry_cell_setting            'monoclinic' 
_symmetry_space_group_name_H-M    'P21/c'
 
loop_ 
 _symmetry_equiv_pos_as_xyz 
 'x, y, z' 
 '-x, y+1/2, -z+1/2' 
 '-x, -y, -z' 
 'x, -y-1/2, z-1/2' 
 
_cell_length_a                    15.8321(5) 
_cell_length_b                    14.3899(4) 
_cell_length_c                    18.7392(6) 
_cell_angle_alpha                 90.00 
_cell_angle_beta                  96.970(1) 
_cell_angle_gamma                 90.00 
_cell_volume                      4237.7(2) 
_cell_formula_units_Z             4 
_cell_measurement_temperature     223(2) 
_cell_measurement_reflns_used     4203
_cell_measurement_theta_min       0.88
_cell_measurement_theta_max       68.25
 
_exptl_crystal_description        'block'
_exptl_crystal_colour             'colourless'
_exptl_crystal_size_max           0.30 
_exptl_crystal_size_mid           0.20 
_exptl_crystal_size_min           0.20 
_exptl_crystal_density_meas       ? 
_exptl_crystal_density_diffrn     1.418 
_exptl_crystal_density_method     'not measured' 
_exptl_crystal_F_000              1856 
_exptl_absorpt_coefficient_mu     5.153 
_exptl_absorpt_correction_type    'multi-scan'
_exptl_absorpt_correction_T_min   0.3070 
_exptl_absorpt_correction_T_max   0.4255 
_exptl_absorpt_process_details    
 'Denzo (Otwinowski, Borek, Majewski & Minor, 2003)' 
 
_exptl_special_details 
; 
 ? 
; 
 
_diffrn_ambient_temperature       223(2) 
_diffrn_radiation_wavelength      1.54178 
_diffrn_radiation_type            CuK\a 
_diffrn_radiation_source          'fine-focus sealed tube' 
_diffrn_radiation_monochromator   graphite 
_diffrn_measurement_device_type   'Nonius KappaCCD APEXII' 
_diffrn_measurement_method        '\w and \f scans'
_diffrn_detector_area_resol_mean  ? 
_diffrn_standards_number          ? 
_diffrn_standards_interval_count  ? 
_diffrn_standards_interval_time   ? 
_diffrn_standards_decay_%         ? 
_diffrn_reflns_number             43315
_diffrn_reflns_av_R_equivalents   0.063 
_diffrn_reflns_av_sigmaI/netI     0.0248 
_diffrn_reflns_limit_h_min        -18
_diffrn_reflns_limit_h_max        19 
_diffrn_reflns_limit_k_min        -12
_diffrn_reflns_limit_k_max        17 
_diffrn_reflns_limit_l_min        -22 
_diffrn_reflns_limit_l_max        22 
_diffrn_reflns_theta_min          2.81 
_diffrn_reflns_theta_max          67.96 
_reflns_number_total              7559 
_reflns_number_gt                 6648 
_reflns_threshold_expression      >2sigma(I) 
 
_computing_data_collection        'Collect (Nonius B.V., 1998)' 
_computing_cell_refinement        'Collect (Nonius B.V., 1998)'
_computing_data_reduction         'Denzo-SMN (Otwinowski & Minor, 1997)'
_computing_structure_solution     'SHELXS-97 (Sheldrick, 1990)' 
_computing_structure_refinement   'SHELXL-97 (Sheldrick, 1997)' 
_computing_molecular_graphics     'XP (BrukerAXS, 2000)'
_computing_publication_material   'SHELXL-97 (Sheldrick, 1997)'
 
_refine_special_details 
; 
 Refinement of F^2^ against ALL reflections.  The weighted R-factor wR and 
 goodness of fit S are based on F^2^, conventional R-factors R are based 
 on F, with F set to Zero for negative F^2^. The threshold expression of 
 F^2^ > 2sigma(F^2^) is used only for calculating R-factors(gt) etc. and is 
 not relevant to the choice of reflections for refinement.  R-factors based 
 on F^2^ are statistically about twice as large as those based on F, and R- 
 factors based on all data will be even larger. 
; 
 
_refine_ls_structure_factor_coef  Fsqd  
_refine_ls_matrix_type            full 
_refine_ls_weighting_scheme       calc  
_refine_ls_weighting_details 
 'calc w=1/[\s^2^(Fo^2^)+(0.0652P)^2^+3.1701P] where P=(Fo^2^+2Fc^2^)/3' 
_atom_sites_solution_primary      direct 
_atom_sites_solution_secondary    difmap 
_atom_sites_solution_hydrogens    'at N2 from difmap, others geom' 
_refine_ls_hydrogen_treatment     mixed 
_refine_ls_extinction_method      none 
_refine_ls_extinction_coef        ? 
_refine_ls_number_reflns          7559 
_refine_ls_number_parameters      533 
_refine_ls_number_restraints      18 
_refine_ls_R_factor_all           0.0533 
_refine_ls_R_factor_gt            0.0474 
_refine_ls_wR_factor_ref          0.1302 
_refine_ls_wR_factor_gt           0.1245 
_refine_ls_goodness_of_fit_ref    1.028 
_refine_ls_restrained_S_all       1.032 
_refine_ls_shift/su_max           0.001 
_refine_ls_shift/su_mean          0.000 
 
loop_ 
 _atom_site_label 
 _atom_site_type_symbol 
 _atom_site_fract_x 
 _atom_site_fract_y 
 _atom_site_fract_z 
 _atom_site_U_iso_or_equiv 
 _atom_site_adp_type 
 _atom_site_occupancy 
 _atom_site_symmetry_multiplicity 
 _atom_site_calc_flag 
 _atom_site_refinement_flags 
 _atom_site_disorder_assembly 
 _atom_site_disorder_group 
C1A C 0.71134(14) 0.39161(15) 0.14531(11) 0.0335(5) Uani 1 1 d . . . 
H1A H 0.6853 0.3346 0.1227 0.040 Uiso 1 1 calc R . . 
N2A N 0.70042(12) 0.38991(14) 0.22105(10) 0.0355(4) Uani 1 1 d . . . 
H2A H 0.7016(17) 0.4453(19) 0.2426(14) 0.043 Uiso 1 1 d . . . 
C3A C 0.72812(13) 0.31750(16) 0.26585(12) 0.0348(5) Uani 1 1 d . . . 
C4A C 0.73725(15) 0.22734(16) 0.23980(13) 0.0417(5) Uani 1 1 d . . . 
H4A H 0.7280 0.2164 0.1900 0.050 Uiso 1 1 calc R . . 
C5A C 0.75949(17) 0.15434(18) 0.28580(15) 0.0490(6) Uani 1 1 d . . . 
H5A H 0.7635 0.0941 0.2671 0.059 Uiso 1 1 calc R . . 
C6A C 0.77605(19) 0.16853(18) 0.35955(15) 0.0532(7) Uani 1 1 d . . . 
H6A H 0.7911 0.1185 0.3908 0.064 Uiso 1 1 calc R . . 
C7A C 0.77012(17) 0.25674(18) 0.38587(14) 0.0480(6) Uani 1 1 d . . . 
H7A H 0.7821 0.2667 0.4356 0.058 Uiso 1 1 calc R . . 
C8A C 0.74674(14) 0.33272(16) 0.34096(12) 0.0378(5) Uani 1 1 d . . . 
C9A C 0.74650(15) 0.42388(16) 0.37453(12) 0.0386(5) Uani 1 1 d . . . 
H9A H 0.7641 0.4273 0.4242 0.046 Uiso 1 1 calc R . . 
N10A N 0.72434(12) 0.49956(13) 0.34208(10) 0.0361(4) Uani 1 1 d . . . 
C11A C 0.72668(14) 0.58486(16) 0.38544(12) 0.0371(5) Uani 1 1 d . . . 
H11A H 0.7607 0.5717 0.4323 0.044 Uiso 1 1 calc R . . 
C1B C 0.77277(15) 0.66272(16) 0.34785(12) 0.0385(5) Uani 1 1 d . . . 
H1B H 0.7582 0.7228 0.3690 0.046 Uiso 1 1 calc R . . 
N2B N 0.74041(13) 0.66467(14) 0.27198(10) 0.0392(4) Uani 1 1 d . . . 
H2B H 0.7253(18) 0.615(2) 0.2549(15) 0.047 Uiso 1 1 d . . . 
C3B C 0.76097(14) 0.73167(16) 0.22534(13) 0.0379(5) Uani 1 1 d . . . 
C4B C 0.79708(16) 0.81721(17) 0.24879(14) 0.0460(6) Uani 1 1 d . . . 
H4B H 0.8097 0.8285 0.2983 0.055 Uiso 1 1 calc R . . 
C5B C 0.81432(17) 0.88473(18) 0.20071(16) 0.0530(6) Uani 1 1 d . . . 
H5B H 0.8375 0.9417 0.2180 0.064 Uiso 1 1 calc R . . 
C6B C 0.79802(18) 0.87023(19) 0.12701(16) 0.0544(7) Uani 1 1 d . . . 
H6B H 0.8092 0.9170 0.0944 0.065 Uiso 1 1 calc R . . 
C7B C 0.76512(17) 0.78581(18) 0.10288(15) 0.0489(6) Uani 1 1 d . . . 
H7B H 0.7551 0.7751 0.0531 0.059 Uiso 1 1 calc R . . 
C8B C 0.74615(14) 0.71549(16) 0.14987(12) 0.0383(5) Uani 1 1 d . . . 
C9B C 0.71476(14) 0.62847(16) 0.11812(12) 0.0380(5) Uani 1 1 d . . . 
H9B H 0.7128 0.6227 0.0680 0.046 Uiso 1 1 calc R . . 
N10B N 0.68957(11) 0.55895(13) 0.15217(10) 0.0353(4) Uani 1 1 d . . . 
C11B C 0.66190(13) 0.47660(15) 0.11075(11) 0.0338(5) Uani 1 1 d . . . 
H11B H 0.6771 0.4845 0.0614 0.041 Uiso 1 1 calc R . . 
C21A C 0.80341(14) 0.39543(15) 0.13080(11) 0.0339(5) Uani 1 1 d . . . 
C22A C 0.86881(15) 0.42270(18) 0.18231(13) 0.0431(5) Uani 1 1 d . . . 
H22A H 0.8570 0.4362 0.2292 0.052 Uiso 1 1 calc R . . 
C23A C 0.95138(16) 0.43042(19) 0.16583(14) 0.0491(6) Uani 1 1 d . . . 
H23A H 0.9953 0.4487 0.2013 0.059 Uiso 1 1 calc R . . 
C24A C 0.96889(15) 0.41116(18) 0.09723(15) 0.0464(6) Uani 1 1 d . . . 
C25A C 0.90507(17) 0.3828(2) 0.04486(14) 0.0502(6) Uani 1 1 d . . . 
H25A H 0.9173 0.3692 -0.0019 0.060 Uiso 1 1 calc R . . 
C26A C 0.82316(15) 0.37481(18) 0.06221(13) 0.0424(5) Uani 1 1 d . . . 
H26A H 0.7797 0.3550 0.0269 0.051 Uiso 1 1 calc R . . 
Cl1A Cl 1.07191(4) 0.42402(6) 0.07589(5) 0.0700(2) Uani 1 1 d . . . 
C31A C 0.63703(14) 0.60839(16) 0.39985(12) 0.0373(5) Uani 1 1 d . . . 
C32A C 0.57361(17) 0.6374(2) 0.34707(14) 0.0554(7) Uani 1 1 d . . . 
H32A H 0.5869 0.6472 0.3001 0.066 Uiso 1 1 calc R . . 
C33A C 0.49114(17) 0.6523(2) 0.36203(15) 0.0599(7) Uani 1 1 d . . . 
H33A H 0.4488 0.6717 0.3256 0.072 Uiso 1 1 calc R . . 
C34A C 0.47198(16) 0.63833(18) 0.43098(15) 0.0473(6) Uani 1 1 d . . . 
C35A C 0.53376(17) 0.6112(2) 0.48456(14) 0.0498(6) Uani 1 1 d . . . 
H35A H 0.5205 0.6030 0.5317 0.060 Uiso 1 1 calc R . . 
C36A C 0.61546(15) 0.59613(18) 0.46878(13) 0.0438(5) Uani 1 1 d . . . 
H36A H 0.6575 0.5771 0.5056 0.053 Uiso 1 1 calc R . . 
Cl2A Cl 0.36818(4) 0.65431(6) 0.45091(4) 0.0661(2) Uani 1 1 d . . . 
C21B C 0.86926(15) 0.65137(16) 0.36162(12) 0.0382(5) Uani 1 1 d . . . 
C22B C 0.91753(15) 0.62239(17) 0.30879(13) 0.0429(5) Uani 1 1 d . . . 
H22B H 0.8905 0.6091 0.2625 0.051 Uiso 1 1 calc R . . 
C23B C 1.00516(16) 0.61276(18) 0.32332(14) 0.0457(6) Uani 1 1 d . . . 
H23B H 1.0374 0.5935 0.2871 0.055 Uiso 1 1 calc R . . 
C24B C 1.04415(16) 0.63173(17) 0.39119(14) 0.0452(6) Uani 1 1 d . . . 
C25B C 0.99829(17) 0.6607(2) 0.44448(14) 0.0541(7) Uani 1 1 d . . . 
H25B H 1.0258 0.6734 0.4908 0.065 Uiso 1 1 calc R . . 
C26B C 0.91129(16) 0.6710(2) 0.42960(14) 0.0508(6) Uani 1 1 d . . . 
H26B H 0.8798 0.6917 0.4660 0.061 Uiso 1 1 calc R . . 
Cl1B Cl 1.15447(4) 0.61870(5) 0.40971(4) 0.05849(19) Uani 1 1 d . . . 
C31B C 0.56617(14) 0.46287(16) 0.10602(11) 0.0350(5) Uani 1 1 d . . . 
C32B C 0.51512(16) 0.51986(19) 0.14166(14) 0.0484(6) Uani 1 1 d . . . 
H32B H 0.5400 0.5680 0.1709 0.058 Uiso 1 1 calc R . . 
C33B C 0.42749(17) 0.5072(2) 0.13502(15) 0.0538(7) Uani 1 1 d . . . 
H33B H 0.3932 0.5470 0.1590 0.065 Uiso 1 1 calc R . . 
C34B C 0.39169(15) 0.43581(18) 0.09301(13) 0.0439(6) Uani 1 1 d . . . 
C35B C 0.44093(16) 0.37788(18) 0.05661(15) 0.0484(6) Uani 1 1 d . . . 
H35B H 0.4159 0.3289 0.0283 0.058 Uiso 1 1 calc R . . 
C36B C 0.52806(15) 0.39303(18) 0.06244(14) 0.0461(6) Uani 1 1 d . . . 
H36B H 0.5618 0.3553 0.0364 0.055 Uiso 1 1 calc R . . 
Cl2B Cl 0.28194(4) 0.41854(5) 0.08514(4) 0.05821(19) Uani 1 1 d . . . 
C101 C 0.4920(4) 0.8699(4) 0.2028(5) 0.108(2) Uani 0.715(7) 1 d PD A 1 
H10A H 0.4474 0.9103 0.1790 0.129 Uiso 0.715(7) 1 calc PR A 1 
H10B H 0.4862 0.8684 0.2542 0.129 Uiso 0.715(7) 1 calc PR A 1 
Cl11 Cl 0.4804(3) 0.7577(3) 0.1671(2) 0.0976(11) Uani 0.715(7) 1 d PD A 1 
Cl12 Cl 0.59161(12) 0.9138(2) 0.19016(19) 0.0951(9) Uani 0.715(7) 1 d PD A 1 
C201 C 0.5320(9) 0.8371(8) 0.2230(7) 0.108(2) Uani 0.285(7) 1 d PD A 2 
H20A H 0.4995 0.8538 0.2624 0.129 Uiso 0.285(7) 1 calc PR A 2 
H20B H 0.5816 0.8007 0.2431 0.129 Uiso 0.285(7) 1 calc PR A 2 
Cl21 Cl 0.4678(6) 0.7697(7) 0.1589(6) 0.110(4) Uani 0.285(7) 1 d PD A 2 
Cl22 Cl 0.5657(9) 0.9377(6) 0.1830(4) 0.139(4) Uani 0.285(7) 1 d PD A 2 
C301 C 1.0182(2) 0.7725(2) 0.18120(16) 0.0656(8) Uani 1 1 d D . . 
H30A H 1.0745 0.7562 0.2056 0.079 Uiso 1 1 calc R . . 
H30B H 0.9794 0.7784 0.2179 0.079 Uiso 1 1 calc R . . 
Cl31 Cl 0.98244(6) 0.68301(6) 0.12184(5) 0.0764(2) Uani 1 1 d D . . 
Cl32 Cl 1.02463(5) 0.87971(6) 0.13774(4) 0.0648(2) Uani 1 1 d D . . 
 
loop_ 
 _atom_site_aniso_label 
 _atom_site_aniso_U_11 
 _atom_site_aniso_U_22 
 _atom_site_aniso_U_33 
 _atom_site_aniso_U_23 
 _atom_site_aniso_U_13 
 _atom_site_aniso_U_12 
C1A 0.0326(11) 0.0381(11) 0.0294(10) -0.0018(9) 0.0015(8) -0.0007(9) 
N2A 0.0390(10) 0.0377(10) 0.0300(9) 0.0013(8) 0.0049(8) 0.0030(8) 
C3A 0.0299(10) 0.0400(12) 0.0349(11) 0.0034(9) 0.0052(8) -0.0010(9) 
C4A 0.0442(13) 0.0420(13) 0.0392(12) -0.0004(10) 0.0060(10) -0.0006(10) 
C5A 0.0544(15) 0.0378(13) 0.0547(15) 0.0011(11) 0.0064(12) 0.0026(11) 
C6A 0.0676(18) 0.0415(14) 0.0490(15) 0.0128(12) 0.0007(13) 0.0041(12) 
C7A 0.0581(15) 0.0480(14) 0.0370(12) 0.0089(11) 0.0024(11) 0.0000(11) 
C8A 0.0363(11) 0.0412(12) 0.0360(11) 0.0051(10) 0.0048(9) -0.0008(9) 
C9A 0.0382(12) 0.0483(13) 0.0291(11) 0.0025(10) 0.0032(9) -0.0013(10) 
N10A 0.0352(9) 0.0401(10) 0.0330(9) -0.0010(8) 0.0038(7) -0.0004(8) 
C11A 0.0381(12) 0.0410(12) 0.0311(11) -0.0045(9) 0.0006(9) 0.0001(9) 
C1B 0.0401(12) 0.0408(12) 0.0341(11) -0.0056(9) 0.0024(9) -0.0006(9) 
N2B 0.0412(11) 0.0392(10) 0.0362(10) -0.0003(8) 0.0003(8) -0.0036(8) 
C3B 0.0321(11) 0.0381(12) 0.0427(12) 0.0022(10) 0.0012(9) 0.0017(9) 
C4B 0.0437(13) 0.0409(13) 0.0516(14) -0.0025(11) -0.0010(11) -0.0008(10) 
C5B 0.0496(15) 0.0383(13) 0.0694(18) 0.0013(12) 0.0000(13) -0.0051(11) 
C6B 0.0533(16) 0.0458(14) 0.0633(17) 0.0140(13) 0.0039(13) -0.0047(12) 
C7B 0.0486(14) 0.0485(14) 0.0481(14) 0.0096(11) 0.0006(11) -0.0047(11) 
C8B 0.0331(11) 0.0401(12) 0.0409(12) 0.0054(10) 0.0004(9) -0.0004(9) 
C9B 0.0337(11) 0.0451(13) 0.0343(11) 0.0047(10) 0.0002(9) -0.0013(9) 
N10B 0.0310(9) 0.0389(10) 0.0351(9) 0.0000(8) 0.0001(7) -0.0001(7) 
C11B 0.0328(11) 0.0406(12) 0.0277(10) -0.0002(9) 0.0029(8) 0.0007(9) 
C21A 0.0335(11) 0.0355(11) 0.0328(11) 0.0017(9) 0.0041(9) 0.0018(9) 
C22A 0.0377(12) 0.0554(14) 0.0357(12) -0.0033(10) 0.0025(9) -0.0047(10) 
C23A 0.0370(13) 0.0583(16) 0.0500(14) 0.0015(12) -0.0035(11) -0.0065(11) 
C24A 0.0338(12) 0.0497(14) 0.0560(15) 0.0105(12) 0.0069(11) 0.0023(10) 
C25A 0.0450(14) 0.0649(17) 0.0424(13) -0.0003(12) 0.0125(11) 0.0055(12) 
C26A 0.0371(12) 0.0544(14) 0.0355(12) -0.0048(10) 0.0038(9) 0.0015(10) 
Cl1A 0.0360(3) 0.0860(5) 0.0908(6) 0.0205(4) 0.0191(3) 0.0015(3) 
C31A 0.0360(12) 0.0414(12) 0.0346(11) -0.0047(9) 0.0040(9) -0.0009(9) 
C32A 0.0424(14) 0.087(2) 0.0367(13) 0.0057(13) 0.0049(11) 0.0104(13) 
C33A 0.0413(14) 0.089(2) 0.0482(15) 0.0104(15) 0.0003(12) 0.0134(14) 
C34A 0.0376(13) 0.0508(14) 0.0547(15) 0.0023(12) 0.0101(11) -0.0011(10) 
C35A 0.0471(14) 0.0623(16) 0.0414(13) 0.0041(12) 0.0116(11) -0.0003(12) 
C36A 0.0381(12) 0.0543(14) 0.0384(12) 0.0024(11) 0.0024(10) -0.0007(10) 
Cl2A 0.0396(3) 0.0822(5) 0.0793(5) 0.0198(4) 0.0182(3) 0.0070(3) 
C21B 0.0383(12) 0.0390(12) 0.0366(11) -0.0031(9) 0.0018(9) -0.0029(9) 
C22B 0.0429(13) 0.0486(13) 0.0361(12) -0.0066(10) 0.0006(10) 0.0043(10) 
C23B 0.0452(13) 0.0487(14) 0.0442(13) -0.0049(11) 0.0092(11) 0.0050(11) 
C24B 0.0423(13) 0.0446(13) 0.0480(14) 0.0024(11) 0.0024(11) -0.0033(10) 
C25B 0.0433(14) 0.0766(19) 0.0409(13) -0.0070(13) -0.0009(11) -0.0083(13) 
C26B 0.0420(13) 0.0734(18) 0.0379(12) -0.0130(12) 0.0080(10) -0.0082(12) 
Cl1B 0.0384(3) 0.0642(4) 0.0712(4) 0.0009(3) -0.0002(3) 0.0019(3) 
C31B 0.0337(11) 0.0401(12) 0.0304(10) 0.0042(9) 0.0006(8) 0.0017(9) 
C32B 0.0383(13) 0.0580(15) 0.0488(14) -0.0124(12) 0.0044(10) -0.0012(11) 
C33B 0.0383(13) 0.0690(18) 0.0552(15) -0.0114(13) 0.0101(11) 0.0033(12) 
C34B 0.0346(12) 0.0561(15) 0.0405(12) 0.0101(11) 0.0025(10) -0.0016(10) 
C35B 0.0364(13) 0.0490(14) 0.0569(15) -0.0059(12) -0.0062(11) -0.0007(10) 
C36B 0.0355(12) 0.0508(14) 0.0506(14) -0.0106(11) -0.0006(10) 0.0044(10) 
Cl2B 0.0329(3) 0.0779(5) 0.0639(4) 0.0076(3) 0.0063(3) -0.0059(3) 
C101 0.082(5) 0.094(4) 0.157(6) -0.029(4) 0.059(5) 0.015(3) 
Cl11 0.123(3) 0.0763(13) 0.0919(14) -0.0043(11) 0.0082(13) 0.0022(13) 
Cl12 0.0561(10) 0.129(2) 0.1017(17) -0.0229(14) 0.0143(7) 0.0017(9) 
C201 0.082(5) 0.094(4) 0.157(6) -0.029(4) 0.059(5) 0.015(3) 
Cl21 0.055(2) 0.112(6) 0.170(8) 0.026(4) 0.039(4) 0.003(3) 
Cl22 0.264(10) 0.091(4) 0.061(3) 0.006(3) 0.018(5) -0.050(6) 
C301 0.075(2) 0.0664(19) 0.0564(17) 0.0010(14) 0.0141(15) 0.0102(16) 
Cl31 0.0742(5) 0.0734(5) 0.0852(6) -0.0168(4) 0.0239(4) -0.0081(4) 
Cl32 0.0643(4) 0.0699(5) 0.0595(4) 0.0026(3) 0.0049(3) -0.0019(3) 
 
_geom_special_details 
; 
 All esds (except the esd in the dihedral angle between two l.s. planes) 
 are estimated using the full covariance matrix.  The cell esds are taken 
 into account individually in the estimation of esds in distances, angles 
 and torsion angles; correlations between esds in cell parameters are only 
 used when they are defined by crystal symmetry.  An approximate (isotropic) 
 treatment of cell esds is used for estimating esds involving l.s. planes. 
; 
 
loop_ 
 _geom_bond_atom_site_label_1 
 _geom_bond_atom_site_label_2 
 _geom_bond_distance 
 _geom_bond_site_symmetry_2 
 _geom_bond_publ_flag 
C1A N2A 1.451(3) . ? 
C1A C21A 1.516(3) . ? 
C1A C11B 1.551(3) . ? 
N2A C3A 1.376(3) . ? 
C3A C4A 1.400(3) . ? 
C3A C8A 1.419(3) . ? 
C4A C5A 1.377(3) . ? 
C5A C6A 1.390(4) . ? 
C6A C7A 1.369(4) . ? 
C7A C8A 1.402(3) . ? 
C8A C9A 1.455(3) . ? 
C9A N10A 1.276(3) . ? 
N10A C11A 1.470(3) . ? 
C11A C31A 1.515(3) . ? 
C11A C1B 1.552(3) . ? 
C1B N2B 1.452(3) . ? 
C1B C21B 1.527(3) . ? 
N2B C3B 1.367(3) . ? 
C3B C4B 1.405(3) . ? 
C3B C8B 1.424(3) . ? 
C4B C5B 1.375(4) . ? 
C5B C6B 1.390(4) . ? 
C6B C7B 1.376(4) . ? 
C7B C8B 1.398(3) . ? 
C8B C9B 1.448(3) . ? 
C9B N10B 1.276(3) . ? 
N10B C11B 1.455(3) . ? 
C11B C31B 1.520(3) . ? 
C21A C22A 1.384(3) . ? 
C21A C26A 1.391(3) . ? 
C22A C23A 1.384(4) . ? 
C23A C24A 1.376(4) . ? 
C24A C25A 1.382(4) . ? 
C24A Cl1A 1.736(3) . ? 
C25A C26A 1.380(4) . ? 
C31A C32A 1.386(3) . ? 
C31A C36A 1.387(3) . ? 
C32A C33A 1.385(4) . ? 
C33A C34A 1.377(4) . ? 
C34A C35A 1.371(4) . ? 
C34A Cl2A 1.744(3) . ? 
C35A C36A 1.379(4) . ? 
C21B C22B 1.386(3) . ? 
C21B C26B 1.393(3) . ? 
C22B C23B 1.388(4) . ? 
C23B C24B 1.372(4) . ? 
C24B C25B 1.369(4) . ? 
C24B Cl1B 1.749(3) . ? 
C25B C26B 1.380(4) . ? 
C31B C32B 1.379(3) . ? 
C31B C36B 1.386(3) . ? 
C32B C33B 1.390(4) . ? 
C33B C34B 1.374(4) . ? 
C34B C35B 1.377(4) . ? 
C34B Cl2B 1.744(2) . ? 
C35B C36B 1.388(3) . ? 
C101 Cl12 1.741(5) . ? 
C101 Cl11 1.748(5) . ? 
C201 Cl22 1.743(8) . ? 
C201 Cl21 1.766(8) . ? 
C301 Cl31 1.750(3) . ? 
C301 Cl32 1.753(3) . ? 
 
loop_ 
 _geom_angle_atom_site_label_1 
 _geom_angle_atom_site_label_2 
 _geom_angle_atom_site_label_3 
 _geom_angle 
 _geom_angle_site_symmetry_1 
 _geom_angle_site_symmetry_3 
 _geom_angle_publ_flag 
N2A C1A C21A 114.04(17) . . ? 
N2A C1A C11B 107.93(17) . . ? 
C21A C1A C11B 110.13(18) . . ? 
C3A N2A C1A 122.87(19) . . ? 
N2A C3A C4A 121.9(2) . . ? 
N2A C3A C8A 120.0(2) . . ? 
C4A C3A C8A 118.1(2) . . ? 
C5A C4A C3A 121.2(2) . . ? 
C4A C5A C6A 120.9(2) . . ? 
C7A C6A C5A 118.8(2) . . ? 
C6A C7A C8A 122.1(2) . . ? 
C7A C8A C3A 118.9(2) . . ? 
C7A C8A C9A 117.3(2) . . ? 
C3A C8A C9A 123.8(2) . . ? 
N10A C9A C8A 125.4(2) . . ? 
C9A N10A C11A 117.54(18) . . ? 
N10A C11A C31A 108.90(18) . . ? 
N10A C11A C1B 109.49(18) . . ? 
C31A C11A C1B 114.95(19) . . ? 
N2B C1B C21B 113.24(19) . . ? 
N2B C1B C11A 109.20(18) . . ? 
C21B C1B C11A 111.23(19) . . ? 
C3B N2B C1B 123.8(2) . . ? 
N2B C3B C4B 122.5(2) . . ? 
N2B C3B C8B 119.8(2) . . ? 
C4B C3B C8B 117.7(2) . . ? 
C5B C4B C3B 121.3(2) . . ? 
C4B C5B C6B 121.2(2) . . ? 
C7B C6B C5B 118.4(2) . . ? 
C6B C7B C8B 122.3(2) . . ? 
C7B C8B C3B 119.0(2) . . ? 
C7B C8B C9B 117.2(2) . . ? 
C3B C8B C9B 123.8(2) . . ? 
N10B C9B C8B 125.8(2) . . ? 
C9B N10B C11B 117.65(19) . . ? 
N10B C11B C31B 111.75(18) . . ? 
N10B C11B C1A 108.40(16) . . ? 
C31B C11B C1A 111.77(18) . . ? 
C22A C21A C26A 118.2(2) . . ? 
C22A C21A C1A 122.7(2) . . ? 
C26A C21A C1A 119.12(19) . . ? 
C23A C22A C21A 120.9(2) . . ? 
C24A C23A C22A 119.7(2) . . ? 
C23A C24A C25A 120.7(2) . . ? 
C23A C24A Cl1A 119.7(2) . . ? 
C25A C24A Cl1A 119.6(2) . . ? 
C26A C25A C24A 119.0(2) . . ? 
C25A C26A C21A 121.5(2) . . ? 
C32A C31A C36A 117.7(2) . . ? 
C32A C31A C11A 123.6(2) . . ? 
C36A C31A C11A 118.6(2) . . ? 
C33A C32A C31A 121.4(2) . . ? 
C34A C33A C32A 119.2(2) . . ? 
C35A C34A C33A 120.7(2) . . ? 
C35A C34A Cl2A 119.2(2) . . ? 
C33A C34A Cl2A 120.1(2) . . ? 
C34A C35A C36A 119.5(2) . . ? 
C35A C36A C31A 121.5(2) . . ? 
C22B C21B C26B 118.1(2) . . ? 
C22B C21B C1B 122.6(2) . . ? 
C26B C21B C1B 119.3(2) . . ? 
C21B C22B C23B 121.0(2) . . ? 
C24B C23B C22B 119.2(2) . . ? 
C25B C24B C23B 121.2(2) . . ? 
C25B C24B Cl1B 119.6(2) . . ? 
C23B C24B Cl1B 119.3(2) . . ? 
C24B C25B C26B 119.4(2) . . ? 
C25B C26B C21B 121.2(2) . . ? 
C32B C31B C36B 118.5(2) . . ? 
C32B C31B C11B 122.2(2) . . ? 
C36B C31B C11B 119.2(2) . . ? 
C31B C32B C33B 121.1(2) . . ? 
C34B C33B C32B 119.1(2) . . ? 
C33B C34B C35B 121.2(2) . . ? 
C33B C34B Cl2B 119.5(2) . . ? 
C35B C34B Cl2B 119.3(2) . . ? 
C34B C35B C36B 118.9(2) . . ? 
C31B C36B C35B 121.2(2) . . ? 
Cl12 C101 Cl11 109.8(3) . . ? 
Cl22 C201 Cl21 110.2(7) . . ? 
Cl31 C301 Cl32 112.63(17) . . ? 
 
loop_ 
 _geom_torsion_atom_site_label_1 
 _geom_torsion_atom_site_label_2 
 _geom_torsion_atom_site_label_3 
 _geom_torsion_atom_site_label_4 
 _geom_torsion 
 _geom_torsion_site_symmetry_1 
 _geom_torsion_site_symmetry_2 
 _geom_torsion_site_symmetry_3 
 _geom_torsion_site_symmetry_4 
 _geom_torsion_publ_flag 
C21A C1A N2A C3A -64.8(3) . . . . ? 
C11B C1A N2A C3A 172.48(19) . . . . ? 
C1A N2A C3A C4A -25.9(3) . . . . ? 
C1A N2A C3A C8A 155.3(2) . . . . ? 
N2A C3A C4A C5A -175.6(2) . . . . ? 
C8A C3A C4A C5A 3.2(3) . . . . ? 
C3A C4A C5A C6A -1.9(4) . . . . ? 
C4A C5A C6A C7A -0.2(4) . . . . ? 
C5A C6A C7A C8A 0.9(4) . . . . ? 
C6A C7A C8A C3A 0.4(4) . . . . ? 
C6A C7A C8A C9A -177.1(3) . . . . ? 
N2A C3A C8A C7A 176.4(2) . . . . ? 
C4A C3A C8A C7A -2.4(3) . . . . ? 
N2A C3A C8A C9A -6.3(3) . . . . ? 
C4A C3A C8A C9A 174.9(2) . . . . ? 
C7A C8A C9A N10A -177.6(2) . . . . ? 
C3A C8A C9A N10A 5.0(4) . . . . ? 
C8A C9A N10A C11A 178.8(2) . . . . ? 
C9A N10A C11A C31A -101.4(2) . . . . ? 
C9A N10A C11A C1B 132.2(2) . . . . ? 
N10A C11A C1B N2B 46.1(2) . . . . ? 
C31A C11A C1B N2B -76.8(2) . . . . ? 
N10A C11A C1B C21B -79.6(2) . . . . ? 
C31A C11A C1B C21B 157.50(19) . . . . ? 
C21B C1B N2B C3B -63.0(3) . . . . ? 
C11A C1B N2B C3B 172.5(2) . . . . ? 
C1B N2B C3B C4B -16.9(3) . . . . ? 
C1B N2B C3B C8B 162.8(2) . . . . ? 
N2B C3B C4B C5B -177.6(2) . . . . ? 
C8B C3B C4B C5B 2.7(4) . . . . ? 
C3B C4B C5B C6B -1.1(4) . . . . ? 
C4B C5B C6B C7B -0.9(4) . . . . ? 
C5B C6B C7B C8B 1.3(4) . . . . ? 
C6B C7B C8B C3B 0.3(4) . . . . ? 
C6B C7B C8B C9B -177.8(2) . . . . ? 
N2B C3B C8B C7B 178.1(2) . . . . ? 
C4B C3B C8B C7B -2.2(3) . . . . ? 
N2B C3B C8B C9B -4.0(3) . . . . ? 
C4B C3B C8B C9B 175.7(2) . . . . ? 
C7B C8B C9B N10B -175.6(2) . . . . ? 
C3B C8B C9B N10B 6.5(4) . . . . ? 
C8B C9B N10B C11B -178.7(2) . . . . ? 
C9B N10B C11B C31B -109.2(2) . . . . ? 
C9B N10B C11B C1A 127.2(2) . . . . ? 
N2A C1A C11B N10B 53.1(2) . . . . ? 
C21A C1A C11B N10B -71.9(2) . . . . ? 
N2A C1A C11B C31B -70.5(2) . . . . ? 
C21A C1A C11B C31B 164.48(17) . . . . ? 
N2A C1A C21A C22A -18.4(3) . . . . ? 
C11B C1A C21A C22A 103.1(2) . . . . ? 
N2A C1A C21A C26A 164.5(2) . . . . ? 
C11B C1A C21A C26A -74.0(3) . . . . ? 
C26A C21A C22A C23A 0.8(4) . . . . ? 
C1A C21A C22A C23A -176.3(2) . . . . ? 
C21A C22A C23A C24A 0.3(4) . . . . ? 
C22A C23A C24A C25A -1.0(4) . . . . ? 
C22A C23A C24A Cl1A 178.2(2) . . . . ? 
C23A C24A C25A C26A 0.5(4) . . . . ? 
Cl1A C24A C25A C26A -178.6(2) . . . . ? 
C24A C25A C26A C21A 0.6(4) . . . . ? 
C22A C21A C26A C25A -1.3(4) . . . . ? 
C1A C21A C26A C25A 175.9(2) . . . . ? 
N10A C11A C31A C32A -68.4(3) . . . . ? 
C1B C11A C31A C32A 54.8(3) . . . . ? 
N10A C11A C31A C36A 108.3(2) . . . . ? 
C1B C11A C31A C36A -128.5(2) . . . . ? 
C36A C31A C32A C33A -1.1(4) . . . . ? 
C11A C31A C32A C33A 175.7(3) . . . . ? 
C31A C32A C33A C34A 0.3(5) . . . . ? 
C32A C33A C34A C35A 0.9(5) . . . . ? 
C32A C33A C34A Cl2A -178.7(2) . . . . ? 
C33A C34A C35A C36A -1.3(4) . . . . ? 
Cl2A C34A C35A C36A 178.3(2) . . . . ? 
C34A C35A C36A C31A 0.5(4) . . . . ? 
C32A C31A C36A C35A 0.6(4) . . . . ? 
C11A C31A C36A C35A -176.3(2) . . . . ? 
N2B C1B C21B C22B -15.4(3) . . . . ? 
C11A C1B C21B C22B 108.0(2) . . . . ? 
N2B C1B C21B C26B 164.3(2) . . . . ? 
C11A C1B C21B C26B -72.3(3) . . . . ? 
C26B C21B C22B C23B 0.3(4) . . . . ? 
C1B C21B C22B C23B -179.9(2) . . . . ? 
C21B C22B C23B C24B 0.4(4) . . . . ? 
C22B C23B C24B C25B -0.6(4) . . . . ? 
C22B C23B C24B Cl1B 179.5(2) . . . . ? 
C23B C24B C25B C26B 0.0(4) . . . . ? 
Cl1B C24B C25B C26B 179.9(2) . . . . ? 
C24B C25B C26B C21B 0.8(4) . . . . ? 
C22B C21B C26B C25B -1.0(4) . . . . ? 
C1B C21B C26B C25B 179.3(3) . . . . ? 
N10B C11B C31B C32B -4.0(3) . . . . ? 
C1A C11B C31B C32B 117.7(2) . . . . ? 
N10B C11B C31B C36B 173.5(2) . . . . ? 
C1A C11B C31B C36B -64.8(3) . . . . ? 
C36B C31B C32B C33B 0.8(4) . . . . ? 
C11B C31B C32B C33B 178.4(2) . . . . ? 
C31B C32B C33B C34B 1.0(4) . . . . ? 
C32B C33B C34B C35B -1.1(4) . . . . ? 
C32B C33B C34B Cl2B 179.3(2) . . . . ? 
C33B C34B C35B C36B -0.5(4) . . . . ? 
Cl2B C34B C35B C36B 179.1(2) . . . . ? 
C32B C31B C36B C35B -2.5(4) . . . . ? 
C11B C31B C36B C35B 179.9(2) . . . . ? 
C34B C35B C36B C31B 2.3(4) . . . . ? 
 
_diffrn_measured_fraction_theta_max    0.979 
_diffrn_reflns_theta_full              67.96 
_diffrn_measured_fraction_theta_full   0.979 
_refine_diff_density_max    0.360 
_refine_diff_density_min   -0.288 
_refine_diff_density_rms    0.050 
